# Supplementary material for: Ammonia oxidizers in the sea-surface microlayer of a coastal marine inlet
Source: PubMed Central journal article supplement (PMC6101417; doi:10.1371/journal.pone.0202636), 2018-08-20

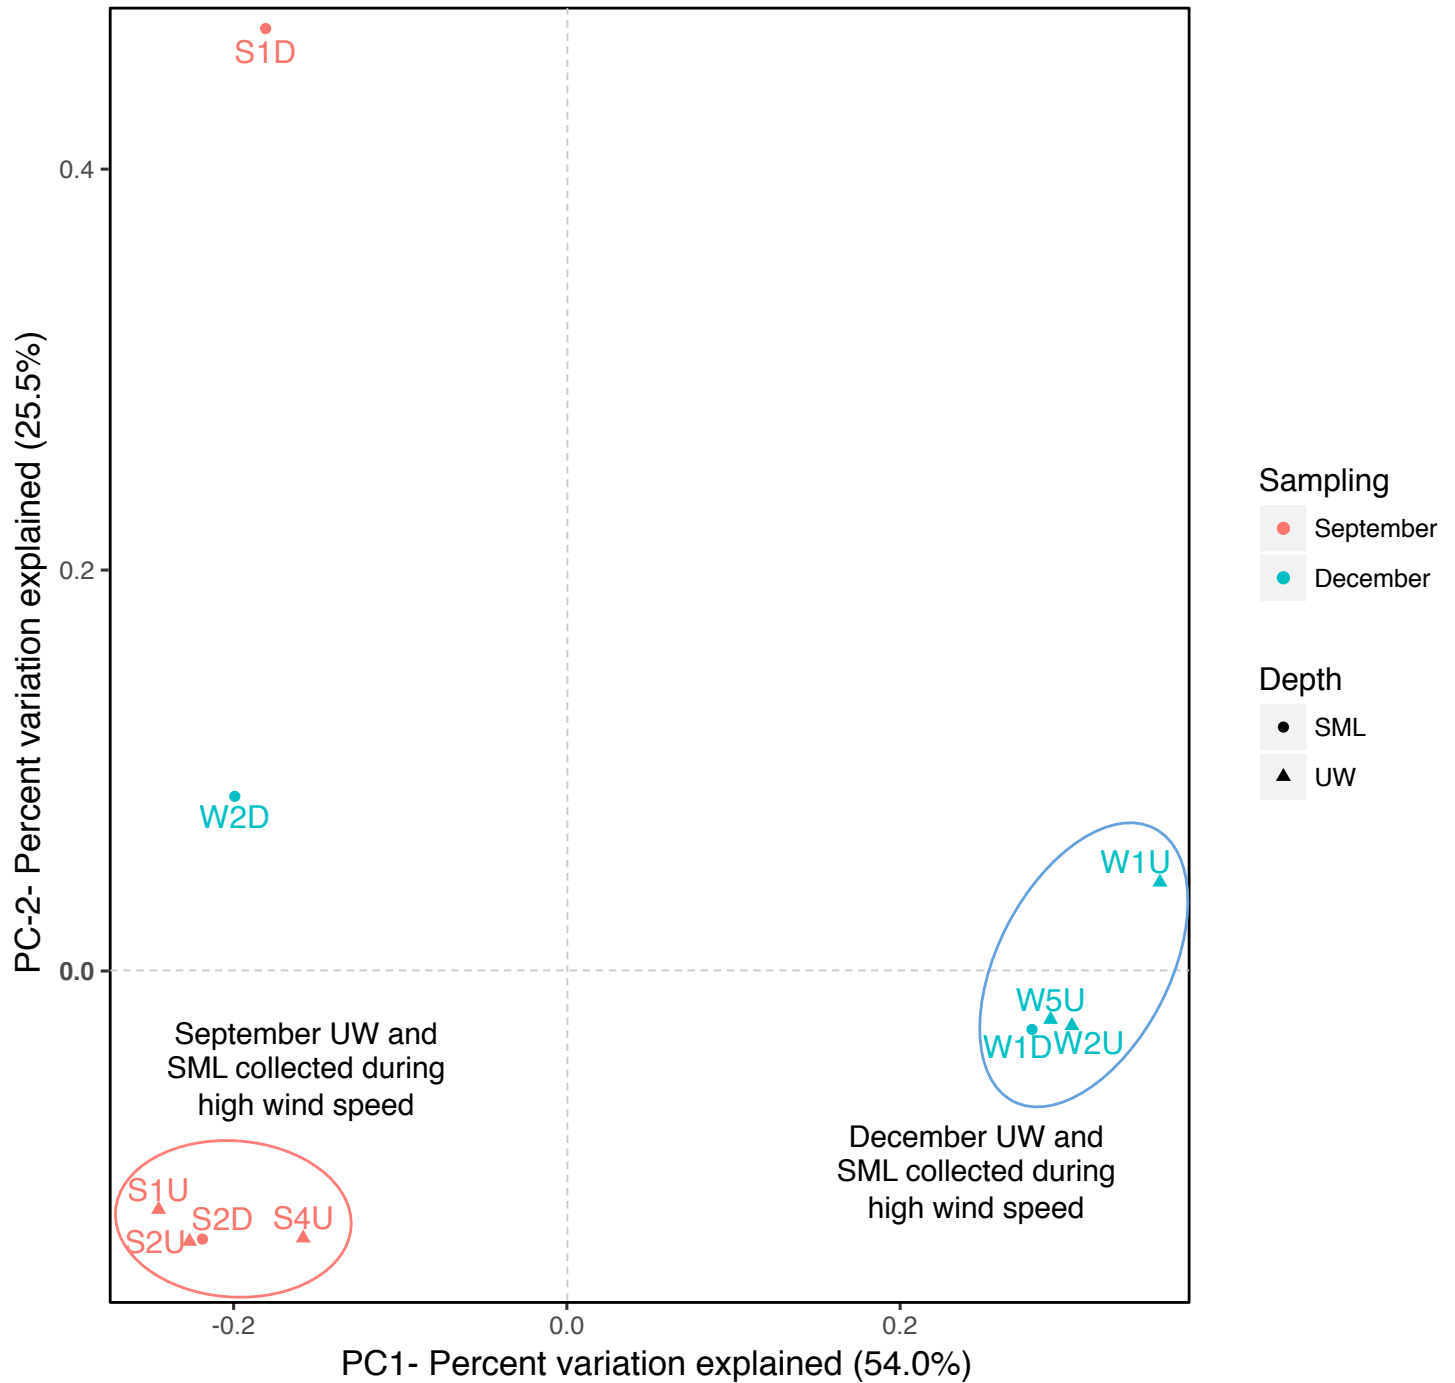

Supplement: pone.0202636.s002.pdf [file pone.0202636.s002.pdf]
